# Supplementary material for: Monte-Carlo Analysis of Asymmetry in Three-Site Relaxation Exchange: Probing Detailed Balance
Source: Copernicus journal article supplement (doi:10.5194/mr-2023-8), 2023-05-22
Supplement: Supplementary file 1 [file mr-2023-8-supplement.pdf]

1 **Monte-Carlo Analysis of Asymmetry in Three-Site Relaxation Exchange:**  
2 **Probing Detailed Balance**  
3 **Supplement**

4  
5 Bernhard Blümich,<sup>1</sup> Matthew Parziale,<sup>2</sup> and Matthew Augustine<sup>2</sup>

6 <sup>1</sup> Institut für Technische und Makromolekulare Chemie, RWTH Aachen University,  
7 Worringer Weg 2, 52074 Aachen, Germany: [bluemich@itmc.rwth-aachen.de](mailto:bluemich@itmc.rwth-aachen.de)

8 <sup>2</sup> Department of Chemistry, UC Davis, One Shields Avenue, Davis, CA 95616, USA:  
9 [mjparziale@ucdavis.edu](mailto:mjparziale@ucdavis.edu), [maugust@ucdavis.edu](mailto:maugust@ucdavis.edu)

10  
11  
12 **Neighborhoods explored in 2D vacancy-diffusion simulations**

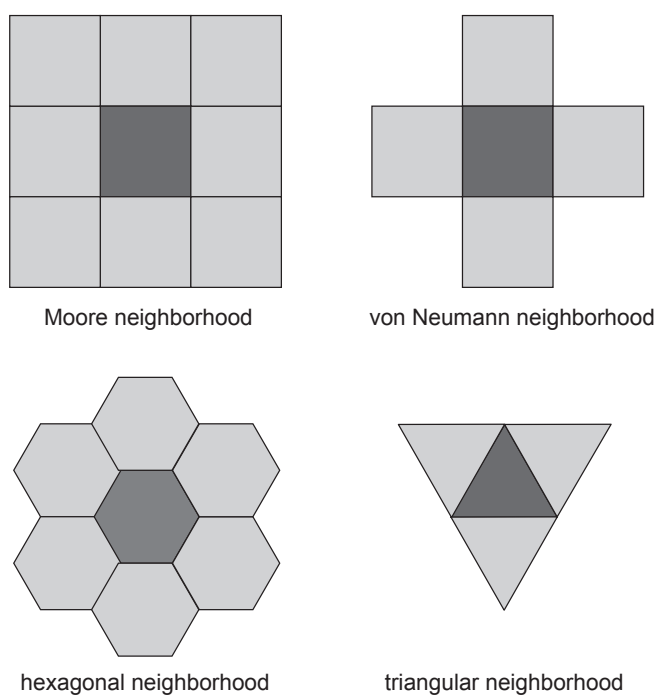

15 Figure S1. Simulation neighborhoods (grids) of range 1 for jumps from the center  
16 position (dark grey) to neighbor positions (light grey). All three asymmetry parameters  
17 from Eqn. (4) were calculated at each simulation run. Only the vacancy-diffusion  
18 simulations produced with the Moore neighborhood obeyed Eqn. (4), while all gas-  
19 diffusion simulations did.

22 **Explicit example for the calculation of  $\Delta U$  and  $\Delta S$  of an initial configuration and**  
 23 **5 possible final configurations (cf. Fig. 2)**

24

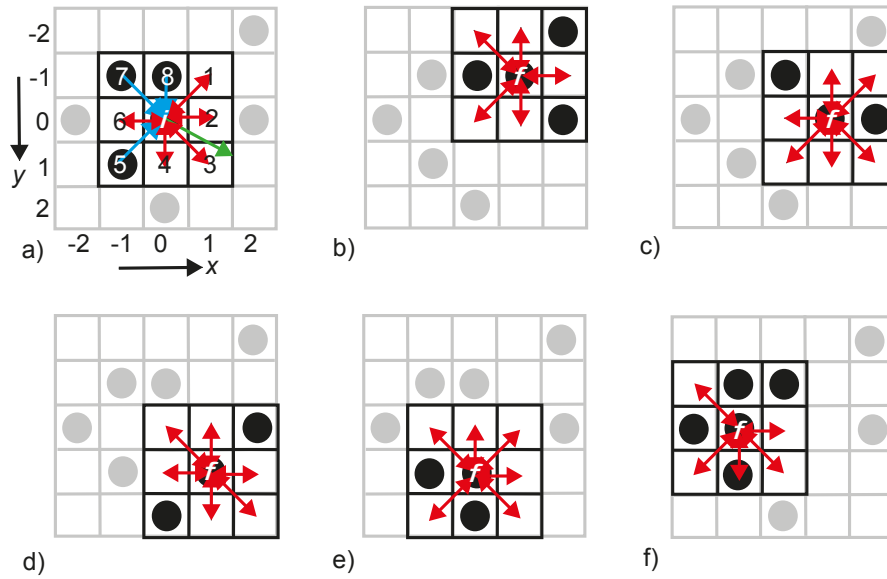

25

26 Figure S2 = Figure 2. Example for tic-tac-toe simulation of confined translational  
 27 diffusion. a) Definition of coordinate frame. Cells with full circles are occupied. The  
 28 initial particle position is marked by  $i$ , the final position by  $f$ . Forces, distances and  
 29 entropies are estimated from the occupation of the 8 cells surrounding the cell of  
 30 interest. The forces (blue arrows) on the particle occupying the initial position result  
 31 from the sum (green arrow) of forces from the three occupied neighboring cells 3, 7,  
 32 and 8. Entropy is estimated from the distances of the central particle to the neighboring  
 33 empty cells (red arrows). b-f) Illustrations to estimate the entropies of the final  
 34 configurations.

35

36 - Calculation of internal energy change  $\Delta U = \mathbf{F} \Delta \mathbf{s}$ :

$$37 \quad \mathbf{F} = \left[ 0 + 0 + 0 + 0 + \frac{1}{2^{3/2}} \begin{pmatrix} -1 \\ 1 \end{pmatrix} + 0 + \frac{1}{2^{3/2}} \begin{pmatrix} -1 \\ -1 \end{pmatrix} + \begin{pmatrix} 0 \\ -1 \end{pmatrix} \right] = \begin{pmatrix} -2^{-1/2} \\ -1 \end{pmatrix},$$

$$38 \quad \Delta \mathbf{R}_1 = \begin{pmatrix} 1 \\ -1 \end{pmatrix}, \Delta \mathbf{R}_2 = \begin{pmatrix} 1 \\ 0 \end{pmatrix}, \Delta \mathbf{R}_3 = \begin{pmatrix} 1 \\ 1 \end{pmatrix}, \Delta \mathbf{R}_4 = \begin{pmatrix} 0 \\ 1 \end{pmatrix},$$

$$39 \quad \Delta \mathbf{R}_5 = \begin{pmatrix} 0 \\ 0 \end{pmatrix}, \Delta \mathbf{R}_6 = \begin{pmatrix} -1 \\ 0 \end{pmatrix}, \Delta \mathbf{R}_7 = \begin{pmatrix} 0 \\ 0 \end{pmatrix}, \Delta \mathbf{R}_8 = \begin{pmatrix} 0 \\ 0 \end{pmatrix}.$$

40 The values of  $\Delta U = \mathbf{F} \Delta \mathbf{R}$  for the 8 neighboring cells are

$$41 \quad \Delta U = \mathbf{F} \Delta \mathbf{R} = \left\{ -2^{-\frac{1}{2}} + 1, -2^{-\frac{1}{2}}, -2^{-\frac{1}{2}} - 1, -1, 0, 2^{-\frac{1}{2}}, 0, 0 \right\}.$$

42 - Note: A better approximation of the force would be to calculate the average force  
 43 as  $\mathbf{F} = (\mathbf{F}_f + \mathbf{F}_i)/2$ .

44 - Estimation of entropies  $S$  from the distances  $|\Delta \mathbf{R}|$  to all 8 neighbors in the particle-  
 45 centered tic-tac-toe frame:

$$46 \quad \text{Initial state (Fig. 2a): } S_i = 2^{\frac{1}{2}} + 1 + 2^{\frac{1}{2}} + 1 + 0 + 1 + 0 + 0 = 3 + 2 \cdot 2^{\frac{1}{2}}$$

- 47 Final state 1 (Fig. 2b):  $S_f = 0 + 1 + 0 + 1 + 2^{\frac{1}{2}} + 0 + 2^{\frac{1}{2}} + 1 = 3 + 2 \cdot 2^{\frac{1}{2}}$
- 48 Final state 2 (Fig. 2c):  $S_f = 2^{\frac{1}{2}} + 0 + 2^{\frac{1}{2}} + 1 + 2^{\frac{1}{2}} + 1 + 0 + 1 = 3 + 3 \cdot 2^{\frac{1}{2}}$
- 49 Final state 3 (Fig. 2d):  $S_f = 0 + 1 + 2^{\frac{1}{2}} + 1 + 0 + 1 + 2^{\frac{1}{2}} + 1 = 4 + 2 \cdot 2^{\frac{1}{2}}$
- 50 Final state 4 (Fig. 2e):  $S_f = 2^{\frac{1}{2}} + 1 + 2^{\frac{1}{2}} + 0 + 2^{\frac{1}{2}} + 0 + 2^{\frac{1}{2}} + 1 = 2 + 4 \cdot 2^{\frac{1}{2}}$
- 51 Final state 5:  $S_f = 0$
- 52 Final state 6 (Fig. 2f):  $S_f = 0 + 1 + 2^{\frac{1}{2}} + 0 + 2^{\frac{1}{2}} + 0 + 2^{\frac{1}{2}} + 0 = 1 + 3 \cdot 2^{\frac{1}{2}}$
- 53 Final state 7:  $S_f = 0$
- 54 Final state 8:  $S_f = 0$

55 The possible entropy changes are

$$56 \Delta S = S_f - S_i = \left\{ 0, \sqrt{2}, 1, -1 + 2 \cdot 2^{\frac{1}{2}}, -3 - 2 \cdot 2^{\frac{1}{2}}, -2 + 2^{\frac{1}{2}}, -3 - 2 \cdot 2^{\frac{1}{2}}, -3 - 2 \cdot 2^{\frac{1}{2}} \right\}.$$

57

### 58 Temperature and pressure dependences of exchange in the complex pore

59 Relevant results for the pore structure of Fig. 3a are summarized in six graphs in Fig.  
 60 S3. All parameters are relative quantities without units. The top three graphs a), b) and  
 61 c) show the variation of  $a_{sy}$  with temperature for a population fraction of 0.2  
 62 corresponding that of a gas. The asymmetry parameter assumes positive and negative  
 63 values in a seemingly erratic but reproducible manner in the range of  $-0.7\% < a_{sy} <$   
 64  $0.4\%$  for repulsive interaction (Fig. S3a), i. e. for the definition of the force between  
 65 particles as illustrated in Fig. 2a. The interaction can be changed to attractive by  
 66 changing the sign of  $\Delta U$  in the expression for the free energy. In this case the  
 67 asymmetry parameter varies as well, however, only between  $\approx 0\% < a_{sy} < 0.5\%$  (Fig.  
 68 S3b). In either case, up to roughly 0.5% of all jumps on the checkerboard proceed in  
 69 a circular fashion between the three sites. With reference to Fig. 1, positive  $a_{sy}$  reports  
 70 that the straight entry route from the bulk into the small pore is preferred over the detour  
 71 via the grain surface. This is the case for attractive interaction at  $T < 2$  (Fig. S3b). For  
 72 repulsive interactions and temperatures  $T > 1$ ,  $a_{sy}$  is negative and the opposite route  
 73 is preferred (Fig. S3a). If the interaction between particles and walls is turned off, i. e.  
 74  $\Delta A = 0$ , then the simulation produces largely noise for  $a_{sy}$  (Fig. S3c). The noise level  
 75 is two orders of magnitude smaller than the maximum absolute values of  $a_{sy}$  obtained  
 76 with either repulsive (Fig. S3a) or attractive interaction (Fig. S3b). This suggests that  
 77 the non-zero values for  $a_{sy}$  reported in Figs. S2a and 4b are trustworthy.

87 At the extrema of the  $a_{sy}(T)$  curves in Figs. S3a,b the dependences of the  
 88 asymmetry parameters on pressure corresponding to population density were  
 89 investigated (Figs. S3d-f). The variations with population density are smoother than  
 90 those with temperature. Positive and negative values of  $a_{sy}$  result at a low temperature  
 91 of  $T = 0.2$  for repulsive interaction (Fig. S3d), whereas either negative or positive  
 92 values arise for repulsive (Fig. S3e) and attractive (Fig. S3f) interactions at higher  
 93 temperatures of  $T = 2.2$  and  $1.3$ , respectively. Interestingly, two well developed  
 94 positive modes result for attractive interaction at  $T = 1.3$ .

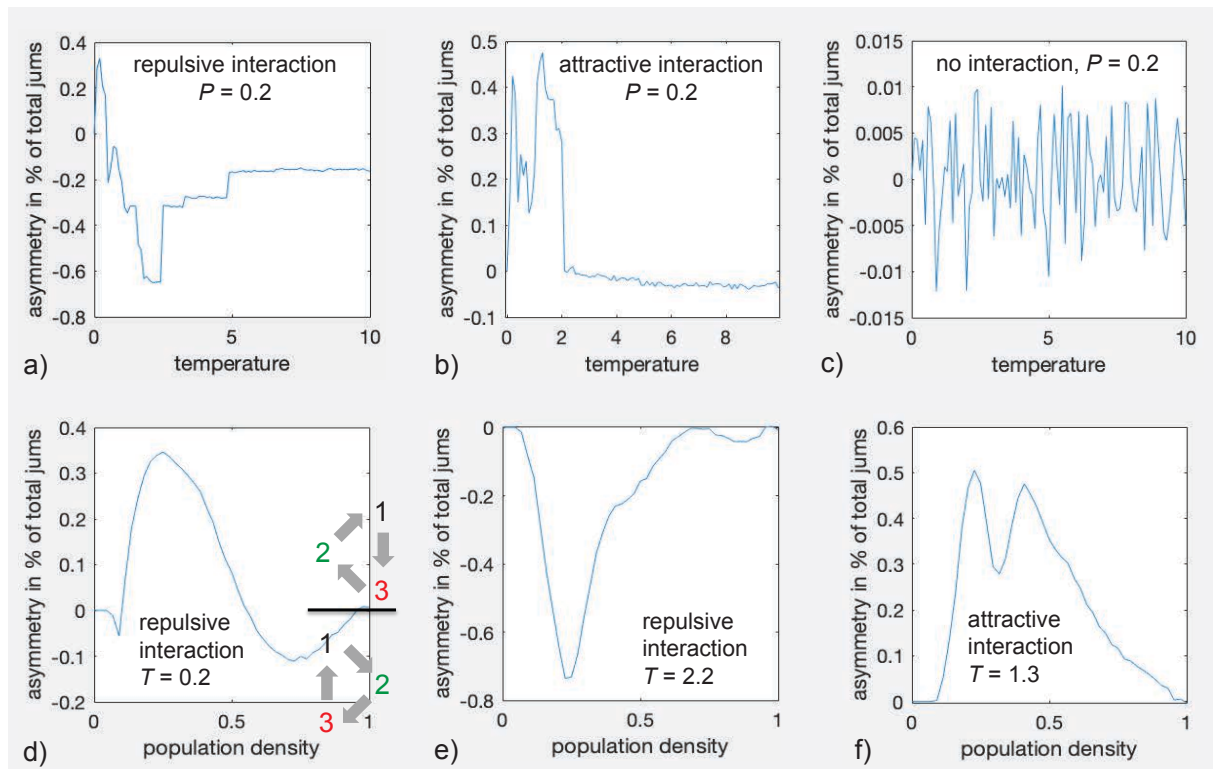

86  
 87 Figure S3. Asymmetry parameters  $a_{sy}$  for diffusion in and out of the grain pore depicted  
 88 in Fig. 3a as a function of relative temperature  $T$  (top row) at a population density of  
 89 0.2 and relative pressure or population density  $P$  (bottom row) at different  
 90 temperatures. a)  $a_{sy}(T)$  for repulsive interaction. b)  $a_{sy}(T)$  for attractive interaction.  
 91 c)  $a_{sy}(T)$  without interaction. d)  $a_{sy}(P)$  for repulsive interaction at  $T = 0.2$ . e)  $a_{sy}(P)$  for  
 92 repulsive interaction at  $T = 2.2$ . f)  $a_{sy}(P)$  for attractive interaction at  $T = 1.3$ .

93

94

95 **Population density distributions for different pores and thermodynamic**  
 96 **parameters**

97

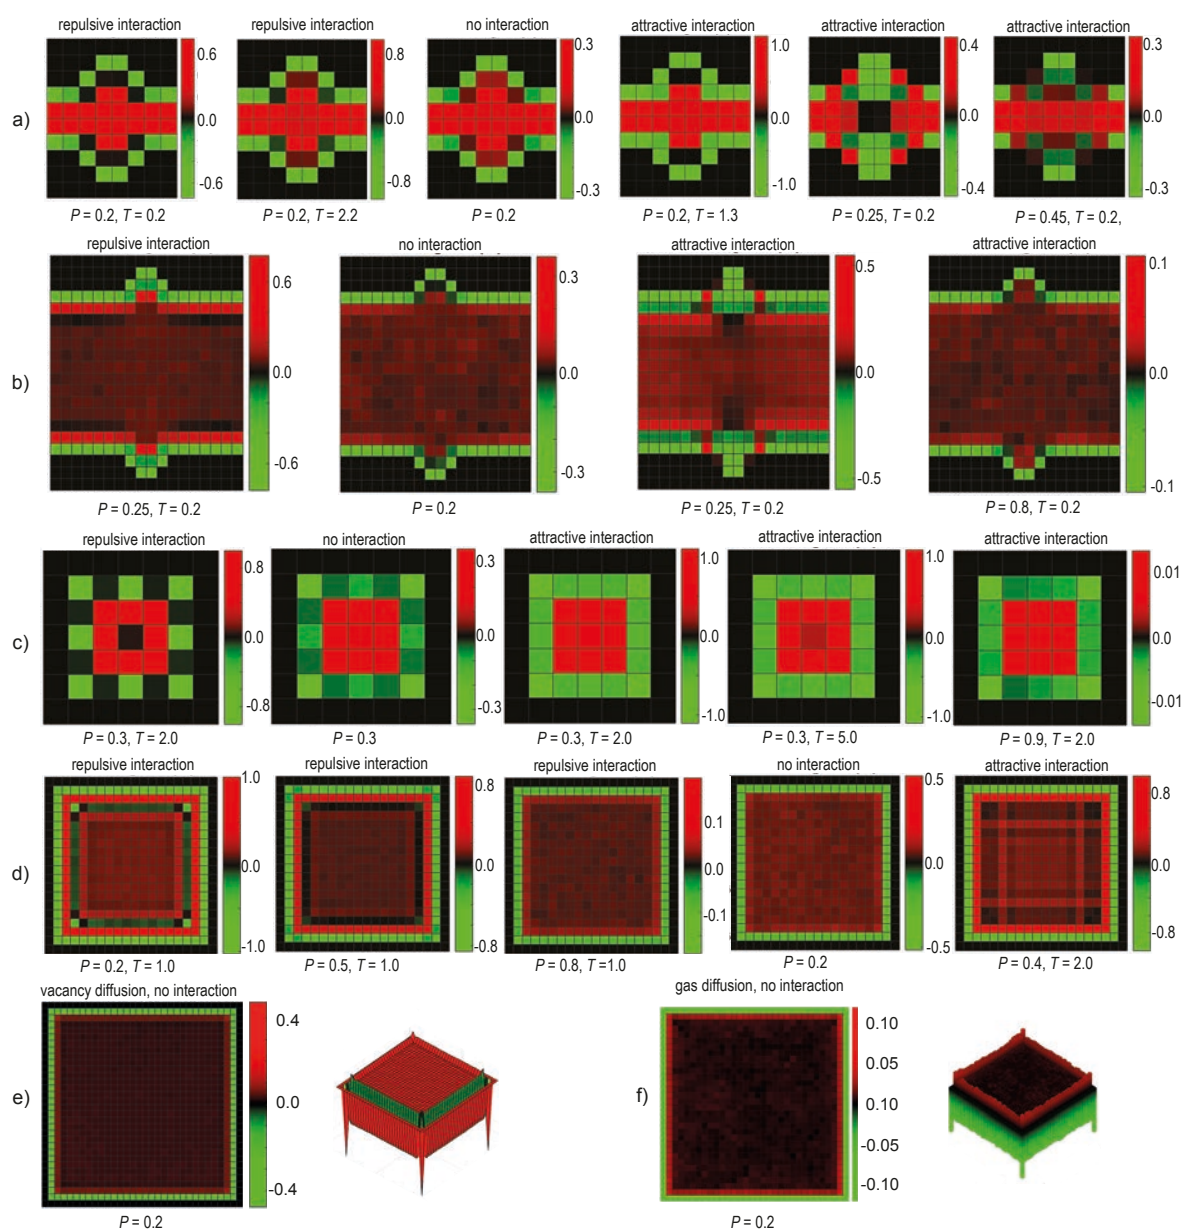

98

99 Figure S4. Maps showing the deviations of the particle density from its mean across  
 100 the pore. a,b) Model for a porous solid,  $10^7$  jumps. c-e) Square pore,  $10^7$  jumps. The  
 101 color scales are different in each plot. The particle concentrations vary more strongly  
 102 with pressure  $P$  than with temperature  $T$ . e) Vacancy diffusion in a  $32 \times 32$  pore with  
 103 repulsive interaction. f) Gas diffusion in a  $32 \times 32$  pore without interaction,  $10^8$  jumps.  
 104

105 **Asymmetry parameter for gas diffusion versus exchange time**

106

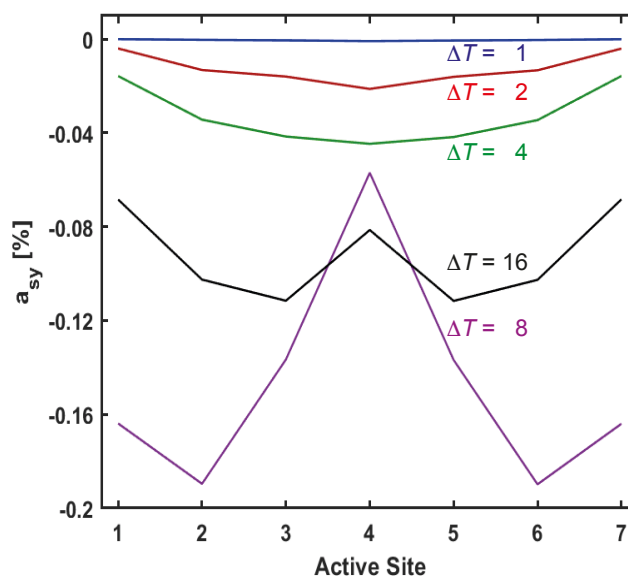

107

108 Figure S5. Asymmetry parameters for gas diffusion in the pore of Fig. 6c for different  
 109 time lags between observations in arbitrary time units (atu). Blue = 1 atu, red = 2 atu,  
 110 green = 4 atu, purple = 8 atu, black = 16 atu from  $5 \times 10^8$  steps. The blue curve (1 atu)  
 111 is the same as the green curve in Fig. 6e.

112

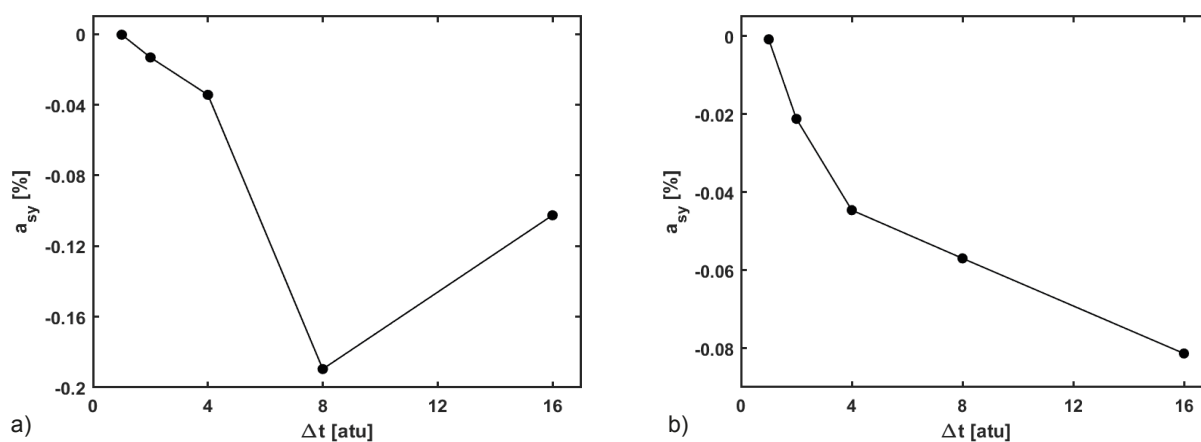

113

114 Figure S6. Variation of the asymmetry parameter for gas diffusion in the pore of Fig.  
 115 6c at positions 2 (a) and 4 (b) of the active site (cf. Fig. S5) as a function of the time  
 116 lag  $\Delta t$  in arbitrary time units.

117
